# Supplementary material for: Heterogeneous catalysts for the controlled ring-opening polymerisation of rac-lactide and homogeneous silsesquioxane model complexes
Source: Royal Society of Chemistry journal article supplement (doi:10.1039/b805274c), 2008-01-01

## Supporting Information:

# Heterogeneous catalysts for the controlled ring opening polymerisation of *rac*-lactide and homogeneous silsesquioxane model complexes

Matthew D. Jones,<sup>a, \*</sup> Matthew G. Davidson,<sup>a</sup> Callum G Keir,<sup>a</sup> Ashley J. Wooles,<sup>a</sup> Mary F. Mahon<sup>b</sup> and David C. Apperley<sup>c</sup>

<sup>a</sup> Department of Chemistry, University of Bath, Claverton Down, Bath. BA2 7AY, U.K. Fax: +44 (0)1225 386231; Tel: +44 (0)1225 384908; E-mail: [mj205@bath.ac.uk](mailto:mj205@bath.ac.uk)

<sup>b</sup> Bath Chemical Crystallography Unit, Department of Chemistry, University of Bath, Claverton Down, Bath. BA2 7AY, U.K.

<sup>c</sup> Durham University, Dept Chemistry, Solid State NMR Service, Durham DH1 3LE, U.K.

### Silica

The silica materials were purchased from Aldrich, the materials have a pore diameter of 40 Å (750 m<sup>2</sup>g<sup>-1</sup>) or 60 Å (480 m<sup>2</sup>g<sup>-1</sup>), where the number in brackets represents the surface area of the material.

### Solid-state NMR:

All spectra were recorded at the EPSRC National Solid-state NMR service centre, Durham. <sup>13</sup>C{<sup>1</sup>H} CP/MAS were recorded on a Varian VNMRS 400 MHz spectrometer and referenced to TMS, a pulse delay of 1.0 s and contact time of 1.0 ms were employed with TPPM decoupling. <sup>27</sup>Al MAS NMR were recorded on the same spectrometer and referenced to 1M AlCl<sub>3</sub>, a recycle delay of 0.2 s was used.

$^{27}\text{Al}$  NMR for Al-SiO<sub>2</sub> (60 Å)

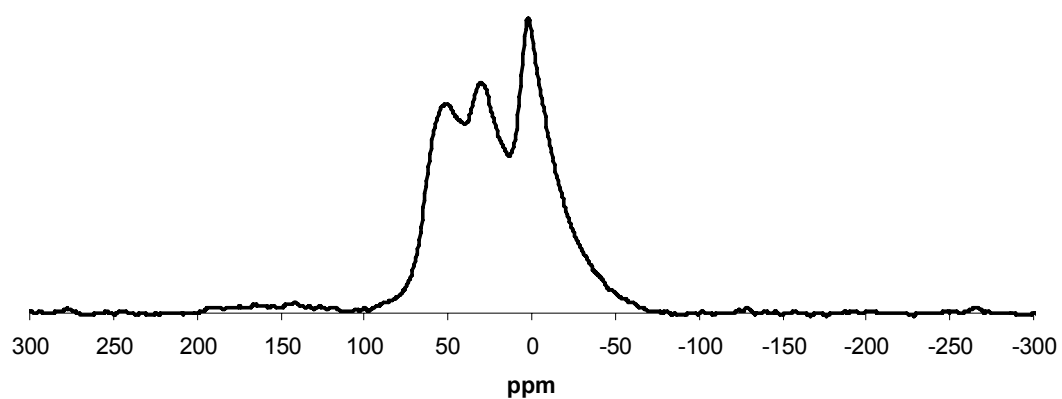

$^{13}\text{C}\{^1\text{H}\}$  NMR for Al-SiO<sub>2</sub> (60 Å)

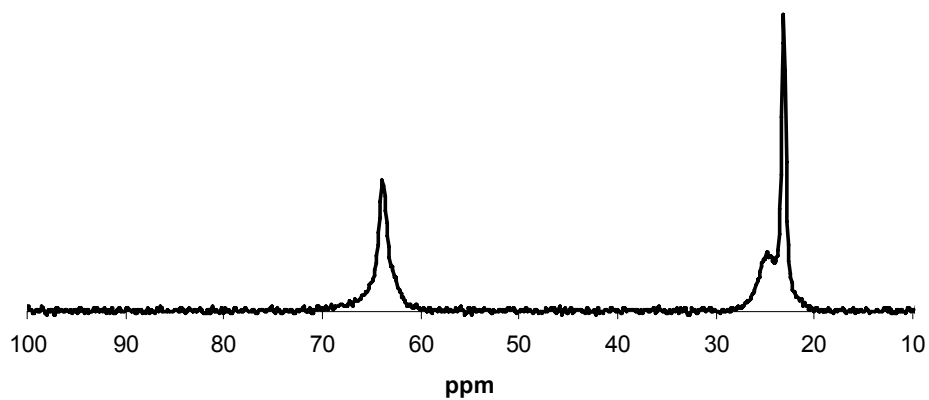

The MALDI-TOF mass spectra were recorded at the EPSRC national mass spectrometry service centre, Swansea. The polymer samples were ionised with NaOAc.

**MALDI-TOF for the polymer produced with Al-SiO<sub>2</sub> (60 Å):**

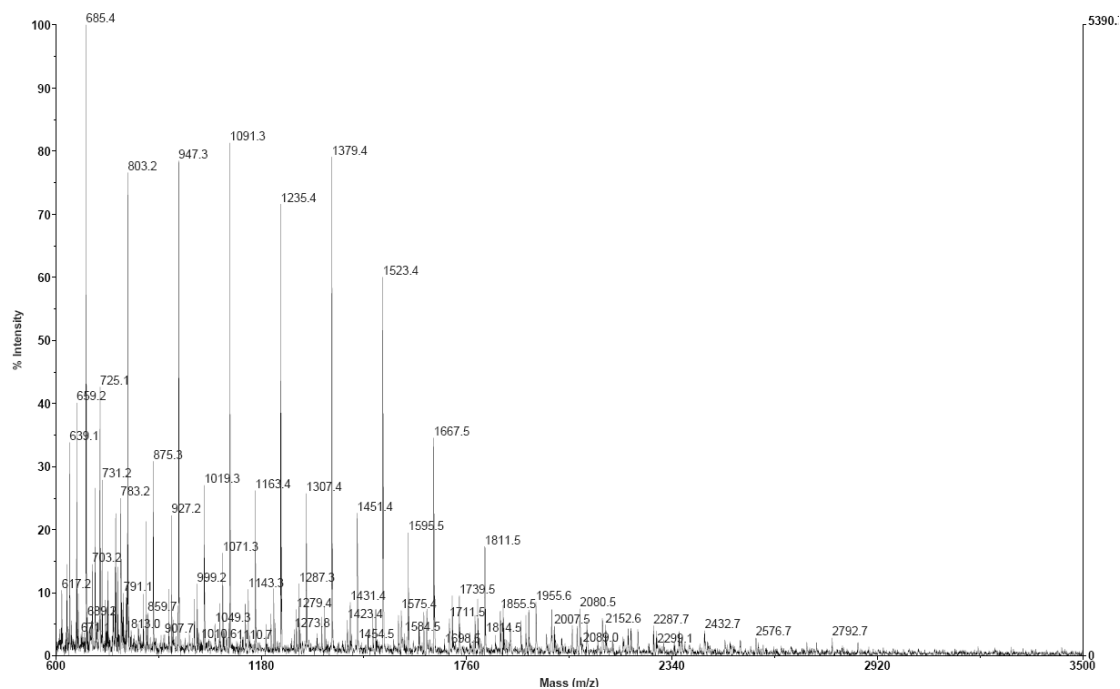

Supplement: b805274c.pdf [file b805274c.pdf]
